# Supplementary material
Source: PubMed Central journal article supplement (PMC5915191)
Supplement: EHP1699.s001.acco.pdf [file EHP1699.s001.acco.pdf]

**Note to readers with disabilities:** *EHP* strives to ensure that all journal content is accessible to all readers. However, some figures and Supplemental Material published in *EHP* articles may not conform to [508 standards](#) due to the complexity of the information being presented. If you need assistance accessing journal content, please contact [ehp508@niehs.nih.gov](mailto:ehp508@niehs.nih.gov). Our staff will work with you to assess and meet your accessibility needs within 3 working days.

### **Supplemental Material**

#### **Traffic-Related Air Pollution and All-Cause Mortality during Tuberculosis Treatment in California**

Robert J. Blount, Lisa Pascopella, Donald G. Catanzaro, Pennan Barry, Paul B. English, Mark R. Segal, Jennifer Flood, Dan Meltzer, Brenda Jones, John Balmes, and Payam Nahid

#### **Table of Contents**

**Table S1:** Unadjusted hazard ratios for mortality during TB treatment for selected predictors.

**Table S2:** Adjusted mortality hazard ratios (95% CI) for bilevel traffic density in each buffer, stratified by self-reported comorbidity, 2010-2012.

**Table S3:** Secondary outcome by nearest-road traffic volumes, 100 m buffer, Kaplan-Meier survival analysis.

**Table S4:** Adjusted mortality hazard ratios (95% CI) for nearest road traffic volumes, 100 m buffer, by Cox model.

**Table S5:** Adjusted mortality hazard ratios (95% CI) for highest quintile traffic density in each buffer, stratified by effect modifier level.

**Figure S1:** Kaplan-Meier survival analysis for *Mycobacterium tuberculosis* culture conversion (from positive to negative) by nearest-road traffic volume quintile in the 100 m buffer.

**Figure S2:** Kaplan-Meier survival analysis for successful TB treatment completion by nearest-road traffic volume quintile in the 100 m buffer.

Table S1: Unadjusted hazard ratios for mortality during TB treatment for selected predictors.

| Predictor                                                      | HR                | p-Value |
|----------------------------------------------------------------|-------------------|---------|
| Traffic volume, nearest road, 100 m buffer (vh/24h)            | --                | --      |
| Q1                                                             | 1.00              | --      |
| Q2                                                             | 1.03 (0.86, 1.22) | 0.78    |
| Q3                                                             | 1.13 (0.96, 1.36) | 0.15    |
| Q4                                                             | 1.18 (0.99, 1.39) | 0.06    |
| Q5                                                             | 1.23 (1.04, 1.45) | 0.02    |
| p-Trend                                                        |                   | 0.004   |
| Traffic volume, highest trafficked road, 100 m buffer (vh/24h) | --                | --      |
| Q1                                                             | 1.00              | --      |
| Q2                                                             | 1.07 (0.89, 1.28) | 0.46    |
| Q3                                                             | 1.33 (1.12, 1.57) | 0.001   |
| Q4                                                             | 1.31 (1.11, 1.56) | 0.002   |
| Q5                                                             | 1.31 (1.10, 1.55) | 0.002   |
| p-Trend                                                        | --                | <0.001  |
| Traffic density, 100 m buffer (vh-km/h)                        | --                | --      |
| Q1                                                             | 1.00              | --      |
| Q2                                                             | 1.00 (0.83, 1.19) | 0.98    |
| Q3                                                             | 1.09 (0.92, 1.30) | 0.33    |
| Q4                                                             | 1.39 (1.18, 1.64) | <0.001  |
| Q5                                                             | 1.23 (1.03, 1.45) | 0.02    |
| p-Trend                                                        | --                | <0.001  |
| Foreign birth                                                  | 0.80 (0.73, 0.87) | <0.001  |
| Residence within city limits                                   | 0.81 (0.71, 1.02) | 0.08    |
| Unemployment                                                   | 2.70 (2.46, 2.96) | <0.001  |
| Homelessness                                                   | 1.14 (0.97, 1.33) | 0.11    |
| Substance abuse                                                | 1.07 (0.95, 1.21) | 0.25    |
| Combined pulmonary and extrapulmonary TB                       | 1.83 (1.65, 2.04) | <0.001  |
| TB meningitis                                                  | 2.18 (1.78, 2.68) | <0.001  |
| Miliary TB                                                     | 2.47 (2.04, 2.99) | <0.001  |
| Smear positive TB                                              | 1.49 (1.37, 1.62) | <0.001  |
| Microbiologically confirmed TB                                 | 4.13 (3.49, 4.89) | <0.001  |
| MDR TB                                                         | 0.50 (0.35, 0.74) | <0.001  |
| Cavitary TB                                                    | 0.81 (0.73, 0.90) | <0.001  |
| Diabetes <sup>a</sup>                                          | 2.53 (2.12, 3.04) | <0.001  |
| HIV-infection                                                  | 1.61 (1.40, 1.86) | <0.001  |
| Non HIV immuno-suppression <sup>a</sup>                        | 3.91 (3.13, 4.88) | <0.001  |
| End-stage renal disease <sup>a</sup>                           | 6.48 (5.08, 8.27) | <0.001  |

Abbreviations: HR, hazard ratio; Q1-Q5, quintiles 1 through 5, where Q5 is the highest quintile of traffic exposure; vh, vehicle; h, hour; p-Trend, the p-value for the trend across quintiles of traffic exposure; TB, tuberculosis; MDR, multi-drug resistant

<sup>a</sup>Represents subgroup analyses of patients enrolled from 2010-12

Table S2. Adjusted<sup>a</sup> mortality hazard ratios (95% CI) for bilevel traffic density<sup>b</sup> in each buffer, stratified by self-reported comorbidity, 2010-2012.

| Population                 | N     | 100 m buffer      | 200 m buffer      | 300 m buffer      | 400 m buffer      |
|----------------------------|-------|-------------------|-------------------|-------------------|-------------------|
| 2010-12 subgroup           | 6,158 | 1.25 (0.95, 1.65) | 1.00 (0.81, 1.25) | 0.98 (0.79, 1.21) | 0.93 (0.76, 1.14) |
| Any comorbidity            |       |                   |                   |                   |                   |
| No                         | 4,406 | 1.45 (0.96, 2.18) | 1.17 (0.83, 1.63) | 0.88 (0.64, 1.21) | 0.89 (0.65, 1.21) |
| Yes                        | 1,752 | 1.15 (0.80, 1.65) | 0.97 (0.73, 1.29) | 1.09 (0.83, 1.42) | 0.99 (0.77, 1.29) |
| <i>p</i> -Interaction      | --    | 0.41              | 0.40              | 0.31              | 0.58              |
| Diabetes                   |       |                   |                   |                   |                   |
| No                         | 4,776 | 1.22 (0.86, 1.73) | 1.06 (0.80, 1.40) | 0.92 (0.70, 1.19) | 0.87 (0.67, 1.12) |
| Yes                        | 1,382 | 1.36 (0.88, 2.11) | 1.00 (0.71, 1.40) | 1.12 (0.81, 1.55) | 1.07 (0.78, 1.46) |
| <i>p</i> -Interaction      | --    | 0.70              | 0.81              | 0.33              | 0.30              |
| Non HIV immuno-suppression |       |                   |                   |                   |                   |
| No                         | 5,748 | 1.41 (1.04, 1.91) | 1.03 (0.81, 1.32) | 0.99 (0.78, 1.25) | 1.00 (0.80, 1.25) |
| Yes                        | 410   | 0.58 (0.30, 1.11) | 0.81 (0.49, 1.34) | 0.81 (0.51, 1.29) | 0.71 (0.46, 1.12) |
| <i>p</i> -Interaction      | --    | 0.01              | 0.39              | 0.45              | 0.19              |
| End-stage renal disease    |       |                   |                   |                   |                   |
| No                         | 5,942 | 1.28 (0.95, 1.72) | 1.02 (0.80, 1.30) | 1.01 (0.81, 1.27) | 0.96 (0.77, 1.20) |
| Yes                        | 216   | 1.08 (0.52, 2.25) | 0.97 (0.58, 1.61) | 0.93 (0.56, 1.52) | 0.95 (0.59, 1.53) |
| <i>p</i> -Interaction      | --    | 0.67              | 0.86              | 0.75              | 0.96              |

<sup>a</sup>Adjusted for age, sex, race, ethnicity, foreign-birth, recent immigration within 5 years prior to TB diagnosis, population density, region, unemployment within one year prior to TB diagnosis, homeless within one year prior to TB diagnosis, excess alcohol and/or recreational drug use within one year prior to TB diagnosis, and HIV-infection.

<sup>b</sup>The HR represents the highest quintile traffic density compared to the lowest quintile traffic density in each effect modifier level and buffer.

\*A statistically significant trend ( $p$ -trend<0.05) exists across quintiles.

Table S3. Secondary outcome by nearest-road traffic volumes, 100 m buffer, Kaplan-Meier survival analysis

| Exposure                     | Secondary outcome                       |                                                      |
|------------------------------|-----------------------------------------|------------------------------------------------------|
|                              | Median (IQR) days to culture conversion | Median (IQR) days to successful treatment completion |
| All quintiles                | 54 (32-83)                              | 256 (190-309)                                        |
| Q1                           | 56 (34-86)                              | 252 (191-306)                                        |
| Q2                           | 55 (34-82)                              | 255 (189-306)                                        |
| Q3                           | 54 (34-81)                              | 252 (190-309)                                        |
| Q4                           | 54 (33-83)                              | 258 (191-313)                                        |
| Q5                           | 53 (33-83)                              | 261 (191-317)                                        |
| <i>p</i> -Value <sup>a</sup> | 0.24                                    | 0.08                                                 |

Abbreviations: Q1-Q5, quintiles 1 through 5, where Q5 is the highest quintile of traffic exposure

<sup>a</sup>Statistical significance between Q5 and Q1 exposures was determined using log-rank tests.

Table S4. Adjusted mortality hazard ratios (95% CI) for nearest road traffic volumes, 100 m buffer, by Cox model.

| Exposure                                | Cox model                                     |                                                                                         |
|-----------------------------------------|-----------------------------------------------|-----------------------------------------------------------------------------------------|
|                                         | Standard multivariable Cox model <sup>a</sup> | Multivariable Cox model <sup>a</sup> with addition of MDR TB and Cavitory TB covariates |
| Nearest-road traffic volumes, quintiles |                                               |                                                                                         |
| Q1                                      | 1.00                                          | 1.00                                                                                    |
| Q2                                      | 1.03 (0.86, 1.25)                             | 1.06 (0.87, 1.29)                                                                       |
| Q3                                      | 1.14 (0.95, 1.37)                             | 1.19 (0.98, 1.44)                                                                       |
| Q4                                      | 1.19 (0.99, 1.43)                             | 1.22 (1.01, 1.48)                                                                       |
| Q5                                      | 1.28 (1.07, 1.53)                             | 1.28 (1.06, 1.55)                                                                       |
| <i>p</i> -Trend                         | 0.002                                         | 0.003                                                                                   |

<sup>a</sup>Adjusted for age, sex, race, ethnicity, foreign-birth, recent immigration within 5 years prior to TB diagnosis, population density, region, unemployment within one year prior to TB diagnosis, homeless within one year prior to TB diagnosis, excess alcohol and/or recreational drug use within one year prior to TB diagnosis, and HIV-infection.

Table S5. Adjusted<sup>a</sup> mortality hazard ratios (95% CI) for highest quintile traffic density<sup>b</sup> in each buffer, stratified by effect modifier level.

| Population            | N      | 100 m buffer       | 200 m buffer       | 300 m buffer      | 400 m buffer      |
|-----------------------|--------|--------------------|--------------------|-------------------|-------------------|
| <b>MDR TB</b>         |        |                    |                    |                   |                   |
| No                    | 23,942 | 1.17 (0.96, 1.42)* | 1.15 (0.97, 1.36)  | 1.15 (0.98, 1.34) | 1.04 (0.89, 1.22) |
| Yes                   | 351    | 1.47 (0.20, 10.6)  | 1.10 (0.24, 4.97)  | 2.74 (0.30, 24.6) | 0.75 (0.21, 2.65) |
| <i>p</i> -Interaction | --     | 0.85               | 0.53               | 0.24              | 0.72              |
| <b>Cavitary TB</b>    |        |                    |                    |                   |                   |
| No                    | 25,319 | 1.13 (0.70, 1.83)* | 1.19 (1.01, 1.42)* | 1.16 (0.98, 1.37) | 1.09 (0.92, 1.28) |
| Yes                   | 6,139  | 1.30 (0.86, 2.03)  | 1.07 (0.74, 1.56)  | 0.96 (0.67, 1.40) | 0.92 (0.65, 1.30) |
| <i>p</i> -Interaction | --     | 0.85               | 0.40               | 0.13              | 0.59              |

Abbreviations: HR, hazard ratio; MDR, multi-drug resistant; TB, tuberculosis

<sup>a</sup>Adjusted for age, sex, race, ethnicity, foreign-birth, recent immigration within 5 years prior to TB diagnosis, population density, region, unemployment within one year prior to TB diagnosis, homeless within one year prior to TB diagnosis, excess alcohol and/or recreational drug use within one year prior to TB diagnosis, and HIV-infection.

<sup>b</sup>The HR represents the highest quintile traffic density compared to the lowest quintile traffic density in each effect modifier level and buffer.

\*A statistically significant trend ( $p$ -trend<0.05) exists across quintiles.

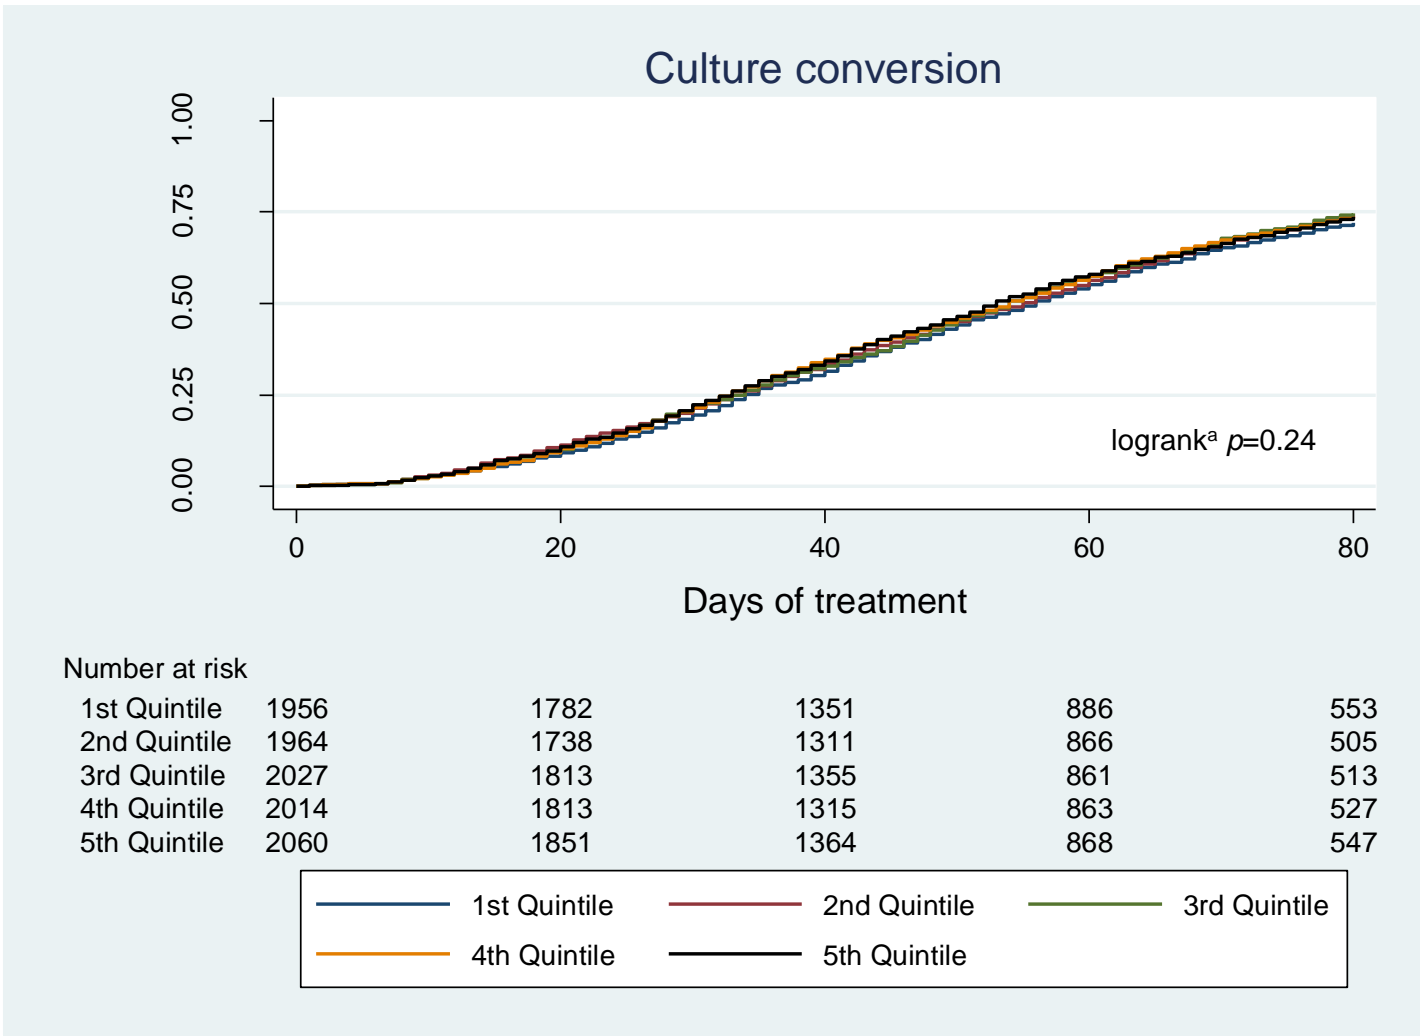

Figure S1. Kaplan-Meier survival analysis for *Mycobacterium tuberculosis* culture conversion (from positive to negative) by nearest-road traffic volume quintile in the 100 m buffer.

<sup>a</sup>Logrank test for statistical significance comparing 5<sup>th</sup> quintile to 1<sup>st</sup> quintile traffic volumes.

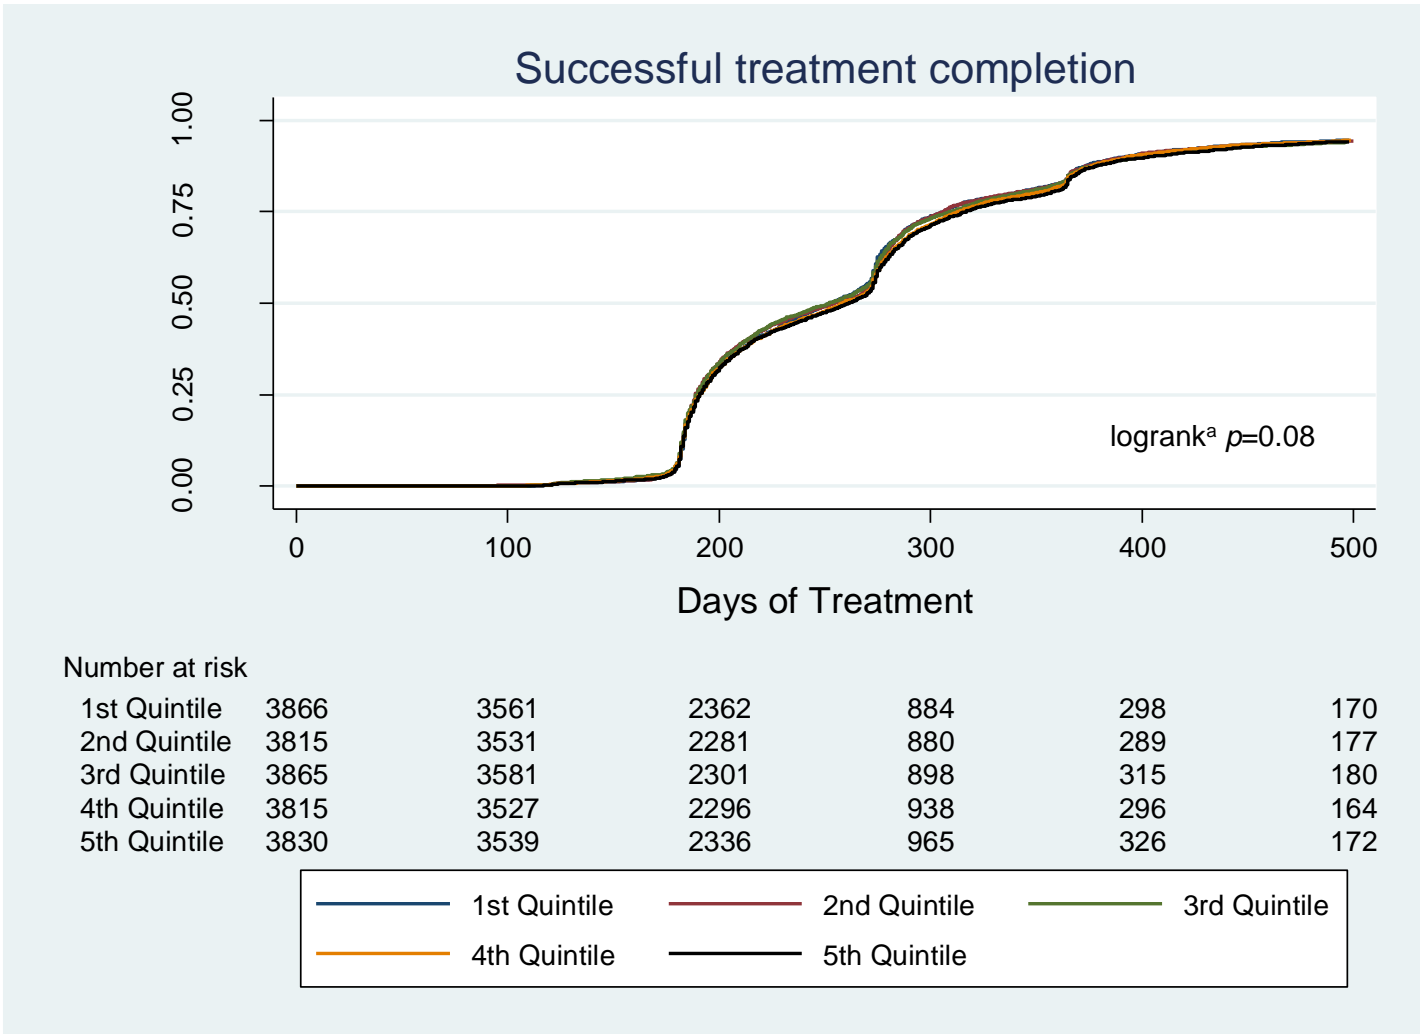

Figure S2. Kaplan-Meier survival analysis for successful TB treatment completion by nearest-road traffic volume quintile in the 100 m buffer.

<sup>a</sup>Logrank test for statistical significance comparing 5<sup>th</sup> quintile to 1<sup>st</sup> quintile traffic volumes.
